---

## Correction to: SEPDB: a database of secreted proteins

This is a correction to: Ruiqing Wang, Chao Ren, Tian Gao, Hao Li, Xiaochen Bo, Dahai Zhu, Dan Zhang, Hebing Chen, Yong Zhang, SEPDB: a database of secreted proteins, Database, Volume 2024, 2024, baae007, <https://doi.org/10.1093/database/baae007>

In the originally published version of this article, the symbol of equal contribution ‡ was erroneously omitted for authors Chao Ren and Tian Gao. This has been corrected.

---

*Database*, 2024, **00**, 1

DOI: <https://doi.org/10.1093/database/baae024>

**Correction**

© The Author(s) 2024. Published by Oxford University Press.

This is an Open Access article distributed under the terms of the Creative Commons Attribution License (<https://creativecommons.org/licenses/by/4.0/>), which permits unrestricted reuse, distribution, and reproduction in any medium, provided the original work is properly cited.
